# Supplementary material
Source: MDPI journal article supplement (https://www.mdpi.com/2073-4433/13/8/1290)
Supplement: s1 [file s1]

# Supplementary Materials: Chemical Characterization and Health Risk Assessment of Particulate Matter from Household Activities in Bamako, Mali, Western Sub-Saharan Africa

Alimata Sidibe<sup>1\*</sup>, Yosuke Sakamoto<sup>1,2,3</sup>, Kentaro Murano<sup>1</sup>, Keiichi Sato<sup>4</sup>, Akie Yuba<sup>4</sup>, Mari Futami<sup>4</sup>, Ousmane A Koita<sup>5</sup>, Ibrahim Traore<sup>5</sup> and Yoshizumi Kajii<sup>1,2,3</sup>

<sup>1</sup> Graduate School of Global Environmental Studies, Kyoto University, Yoshida-Honmachi, Sakyo-ku, Kyoto 606-8501, Japan

<sup>2</sup> Graduate School of Human and Environmental Studies, Yoshida-Nihonmatsu-Cho, Sakyo-ku, Kyoto 606-8501, Japan

<sup>3</sup> Regional Environment Conservation Division, National Institute for Environmental Studies, Tsukuba 305-8506, Japan

<sup>4</sup> Asia Center for Air Pollution Research, 1182 Sowa Nishi-ku, Niigata-shi 950-2144, Japan

<sup>5</sup> Laboratoire de Biologie Moléculaire Appliquée, Faculté des Sciences et Techniques (FAST), University of Sciences, Techniques and Technologies of Bamako (USTTB), Bamako E 3206, Mali

\* Correspondence: sidibe.alimata.r13@kyoto-u.jp

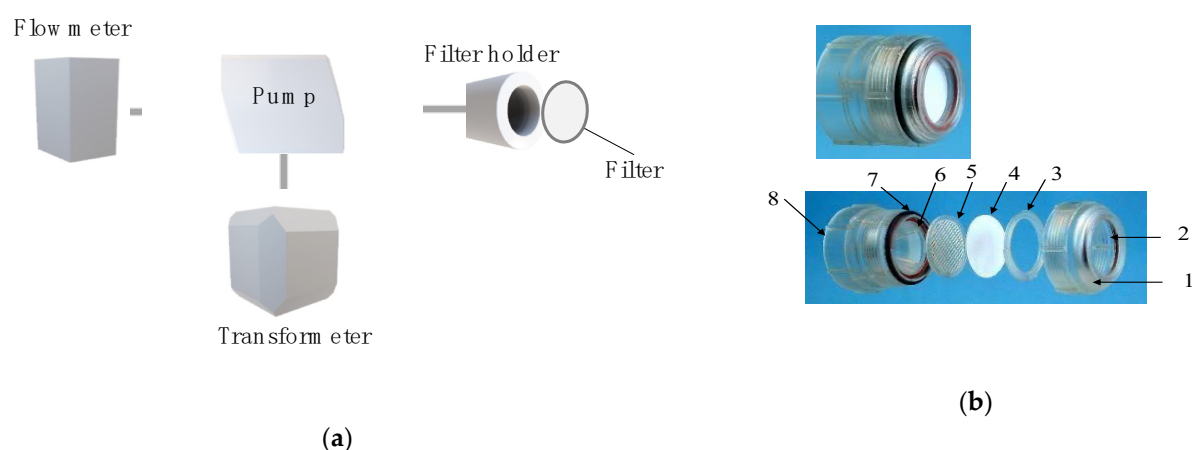

**Figure S1.** In situ sampling system. **(a)** Schematic of the NILU filter holder system used in Bamako, **(b)** Photograph of the sampling system.

Nomenclature for Figure S1. (1) Inlet, (2 and 6) Silicone O-rings (red); (3) Clamping ring; (4) quartz or PTFE filter; (5) filter backing; (7) nitrile O-ring (black); (8) outlet section. The difference in the Nilu filter holder system for both settings (Figure 1 and S2) resulted in the type of inlet.

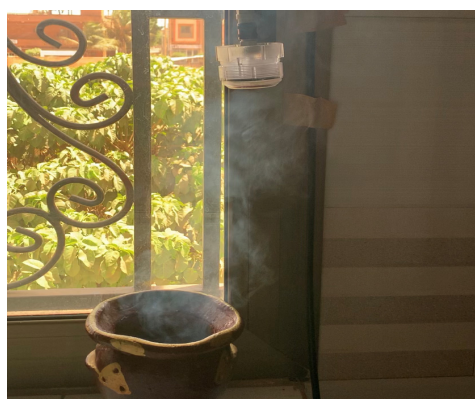

(a)

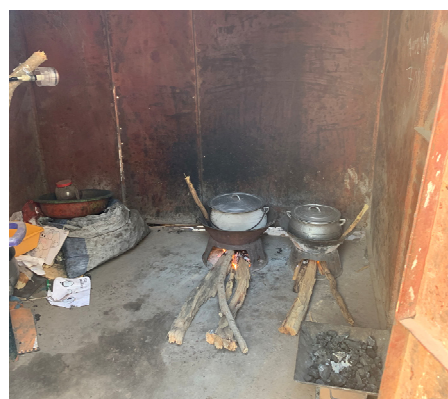

(b)

**Figure S2.** In situ sampling images. (a) Insecticide and incense combustion sampling, (b) Cooking period sampling.

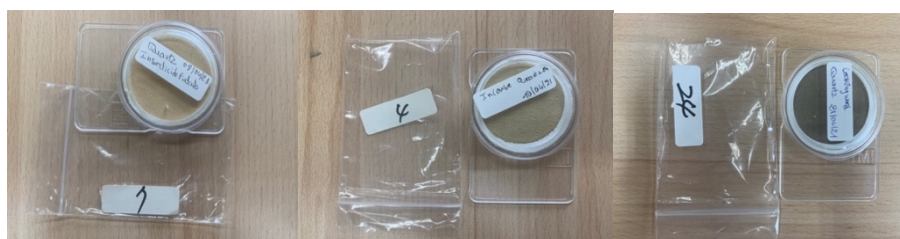

**Figure S3.** Collected filter samples in plastic boxes and zip logs.

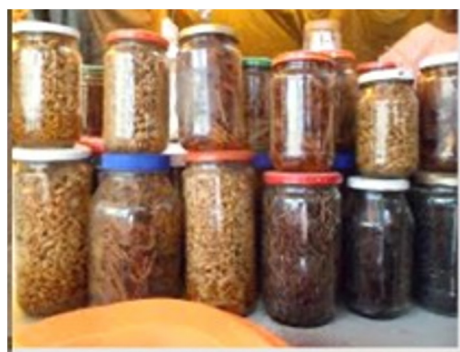

(a)

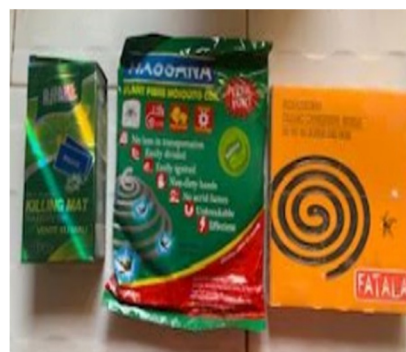

(b)

**Figure S4.** Different IST and ICS products. (a); most popular IST in Bamako © Maliweb.net, (b); Traditional made ICS in Bamako.

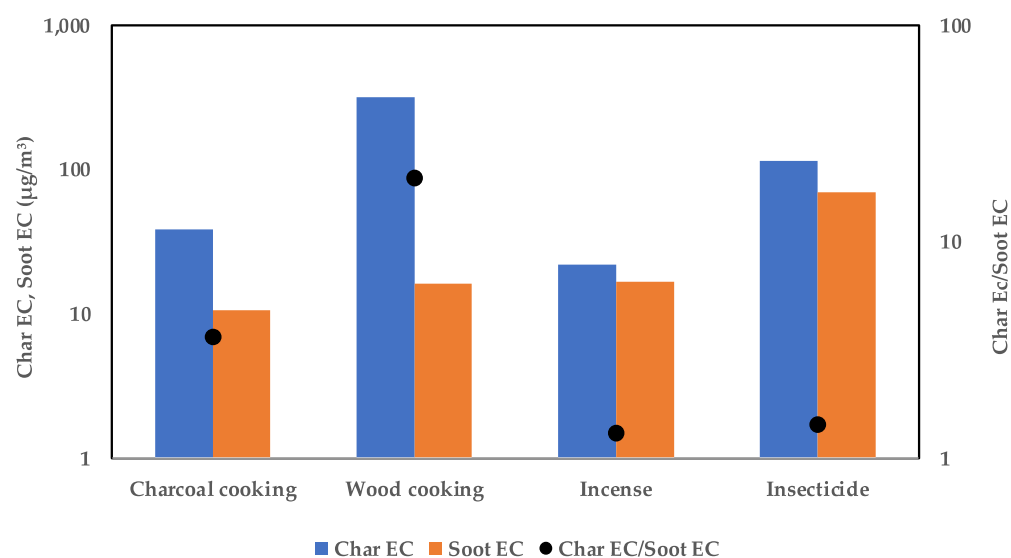

**Figure S5.** Average Char elemental carbon and Soot elemental carbon concentrations and Char elemental carbon/Soot elemental carbon ratio in different particulate matter samples collected by in-situ samplings (Charcoal cooking; Wood cooking; IST: Insecticide; ICS: Incense)

**Table S1.** Average concentration of the particulate matter components for different emission sources collected in situ (values are in µg/m³). ICS: Incense; IST: insecticides; CHL: Charcoal cooking; Wood: Wood Cooking. nd was used for samples having lower values than the blank samples

|                         |                               | ICS (4)                 | IST (4)                 | CHL (2)                 | Wood (2)                | Roadside (3)            |
|-------------------------|-------------------------------|-------------------------|-------------------------|-------------------------|-------------------------|-------------------------|
| Ionic compounds         | SO <sub>4</sub> <sup>2-</sup> | 1.70 × 10 <sup>1</sup>  | 3.30                    | 1.10 × 10 <sup>1</sup>  | 4.00 × 10 <sup>1</sup>  | 2.70                    |
|                         | NO <sub>3</sub> <sup>-</sup>  | 6.70                    | 3.50                    | 7.20                    | 1.80 × 10 <sup>1</sup>  | 1.90                    |
|                         | Cl <sup>-</sup>               | 1.00 × 10 <sup>1</sup>  | 2.30 × 10 <sup>1</sup>  | 6.60                    | 5.00 × 10 <sup>1</sup>  | 9.70 × 10 <sup>-1</sup> |
|                         | F <sup>-</sup>                | 2.00 × 10 <sup>1</sup>  | 5.80 × 10 <sup>1</sup>  | 3.10                    | 8.20                    | 1.40 × 10 <sup>-1</sup> |
|                         | NO <sub>2</sub> <sup>-</sup>  | 2.60 × 10 <sup>1</sup>  | nd                      | nd                      | nd                      | nd                      |
|                         | Br <sup>-</sup>               | 6.20 × 10 <sup>1</sup>  | nd                      | nd                      | nd                      | nd                      |
|                         | NH <sub>4</sub> <sup>+</sup>  | 2.50                    | 2.10 × 10 <sup>1</sup>  | 1.70                    | 3.80                    | 3.10 × 10 <sup>-1</sup> |
|                         | Na <sup>+</sup>               | 1.30                    | 2.00                    | 1.40 × 10 <sup>1</sup>  | 2.70                    | 8.90 × 10 <sup>-1</sup> |
|                         | K <sup>+</sup>                | 1.70 × 10 <sup>1</sup>  | 1.30 × 10 <sup>1</sup>  | 1.40 × 10 <sup>1</sup>  | 8.60 × 10 <sup>1</sup>  | 1.20                    |
|                         | Mg <sup>2+</sup>              | 5.00                    | 1.30                    | 5.10                    | 9.20                    | 4.30 × 10 <sup>-1</sup> |
| Carbonaceous components | Ca <sup>2+</sup>              | 2.30 × 10 <sup>1</sup>  | 9.90                    | 3.10 × 10 <sup>1</sup>  | 5.70 × 10 <sup>1</sup>  | 8.70                    |
|                         | OC                            | 2.00 × 10 <sup>3</sup>  | 5.20 × 10 <sup>3</sup>  | 3.50 × 10 <sup>2</sup>  | 2.30 × 10 <sup>3</sup>  | 2.80 × 10 <sup>1</sup>  |
| Metallic elements       | EC                            | 3.30 × 10 <sup>1</sup>  | 1.70 × 10 <sup>2</sup>  | 5.00 × 10 <sup>1</sup>  | 2.90 × 10 <sup>2</sup>  | 5.80                    |
|                         | Li                            | 5.20 × 10 <sup>-3</sup> | 3.10 × 10 <sup>-3</sup> | 1.10 × 10 <sup>-2</sup> | 1.50 × 10 <sup>-2</sup> | 4.60 × 10 <sup>-3</sup> |
|                         | Be                            | 1.50 × 10 <sup>-4</sup> | 1.50 × 10 <sup>-3</sup> | 1.70 × 10 <sup>-3</sup> | 2.50 × 10 <sup>-3</sup> | 4.10 × 10 <sup>-4</sup> |
|                         | Na                            | 1.70                    | 1.60                    | 3.80                    | 5.10                    | 1.90                    |
|                         | Mg                            | 4.20                    | 1.00                    | 7.80                    | 1.30 × 10 <sup>1</sup>  | 3.50                    |
|                         | Al                            | 1.30 × 10 <sup>1</sup>  | 3.50                    | 2.10 × 10 <sup>1</sup>  | 3.70 × 10 <sup>1</sup>  | 2.20 × 10 <sup>1</sup>  |
|                         | K                             | 1.50 × 10 <sup>1</sup>  | 1.20 × 10 <sup>1</sup>  | 1.80 × 10 <sup>1</sup>  | 8.40 × 10 <sup>1</sup>  | 4.20                    |
|                         | Ca                            | 3.60                    | 9.00 × 10 <sup>-1</sup> | 1.00 × 10 <sup>1</sup>  | 1.50 × 10 <sup>1</sup>  | 2.40                    |
|                         | Sc                            | 1.30 × 10 <sup>-3</sup> | nd                      | 2.20 × 10 <sup>-3</sup> | 4.80 × 10 <sup>-3</sup> | 4.80 × 10 <sup>-3</sup> |

|                          |    |                       |                       |                       |                       |                       |
|--------------------------|----|-----------------------|-----------------------|-----------------------|-----------------------|-----------------------|
| <b>Metallic elements</b> | V  | $2.30 \times 10^{-2}$ | $8.20 \times 10^{-3}$ | $3.70 \times 10^{-2}$ | $7.20 \times 10^{-2}$ | $5.80 \times 10^{-2}$ |
|                          | Cr | $6.60 \times 10^{-2}$ | $1.50 \times 10^{-2}$ | $5.60 \times 10^{-2}$ | $9.50 \times 10^{-2}$ | $7.60 \times 10^{-2}$ |
|                          | Mn | $2.30 \times 10^{-1}$ | $4.30 \times 10^{-2}$ | $4.10 \times 10^{-1}$ | $7.00 \times 10^{-1}$ | $2.10 \times 10^{-1}$ |
|                          | Fe | $1.10 \times 10^1$    | 2.80                  | $1.70 \times 10^1$    | $2.90 \times 10^1$    | $2.30 \times 10^1$    |
|                          | Co | $4.60 \times 10^{-3}$ | $5.40 \times 10^{-4}$ | $5.80 \times 10^{-3}$ | $1.20 \times 10^{-2}$ | $6.50 \times 10^{-3}$ |
|                          | Ni | $1.80 \times 10^{-2}$ | $2.40 \times 10^{-3}$ | $5.90 \times 10^{-2}$ | $3.80 \times 10^{-2}$ | $1.70 \times 10^{-2}$ |
|                          | Cu | $1.90 \times 10^{-2}$ | $1.40 \times 10^{-2}$ | $3.20 \times 10^{-2}$ | $7.10 \times 10^{-2}$ | $2.70 \times 10^{-2}$ |
|                          | Zn | 2.50                  | $1.60 \times 10^{-1}$ | 5.30                  | $1.20 \times 10^1$    | $1.10 \times 10^{-1}$ |
|                          | Ga | $3.70 \times 10^{-2}$ | $1.90 \times 10^{-2}$ | $7.10 \times 10^{-2}$ | $1.60 \times 10^{-1}$ | $3.80 \times 10^{-2}$ |
|                          | As | $3.00 \times 10^{-3}$ | $3.10 \times 10^{-3}$ | $4.80 \times 10^{-3}$ | $7.10 \times 10^{-3}$ | $4.80 \times 10^{-3}$ |
|                          | Se | nd                    | $7.90 \times 10^{-4}$ | $3.00 \times 10^{-4}$ | $1.70 \times 10^{-2}$ | $1.60 \times 10^{-3}$ |
|                          | Rb | $5.10 \times 10^{-2}$ | $8.00 \times 10^{-2}$ | $5.60 \times 10^{-2}$ | $2.20 \times 10^{-1}$ | $1.60 \times 10^{-2}$ |
|                          | Sr | $1.60 \times 10^{-1}$ | $3.20 \times 10^{-2}$ | $3.50 \times 10^{-1}$ | $7.20 \times 10^{-1}$ | $6.60 \times 10^{-2}$ |
|                          | Y  | nd                    | nd                    | nd                    | $7.20 \times 10^{-2}$ | $3.80 \times 10^{-2}$ |
|                          | Mo | nd                    | $1.90 \times 10^{-2}$ | nd                    | nd                    | $9.40 \times 10^{-3}$ |
|                          | Ag | nd                    | nd                    | nd                    | $4.40 \times 10^{-4}$ | $1.70 \times 10^{-4}$ |
|                          | Cd | $1.40 \times 10^{-3}$ | $4.10 \times 10^{-3}$ | $1.40 \times 10^{-3}$ | $3.70 \times 10^{-3}$ | $4.80 \times 10^{-4}$ |
|                          | In | $3.00 \times 10^{-5}$ | nd                    | $8.00 \times 10^{-5}$ | $1.20 \times 10^{-4}$ | $4.00 \times 10^{-5}$ |
|                          | Sb | $4.80 \times 10^{-3}$ | $1.10 \times 10^{-3}$ | $4.50 \times 10^{-3}$ | $7.90 \times 10^{-3}$ | $3.70 \times 10^{-3}$ |
|                          | Cs | $1.20 \times 10^{-3}$ | $2.60 \times 10^{-3}$ | $1.60 \times 10^{-3}$ | $4.20 \times 10^{-3}$ | $7.60 \times 10^{-4}$ |
|                          | Ba | $1.70 \times 10^{-1}$ | $8.90 \times 10^{-2}$ | $3.20 \times 10^{-1}$ | $7.20 \times 10^{-1}$ | $1.60 \times 10^{-1}$ |
|                          | Hg | nd                    | nd                    | nd                    | nd                    | nd                    |
|                          | Ti | $2.10 \times 10^{-3}$ | $8.90 \times 10^{-3}$ | $1.50 \times 10^{-3}$ | $7.70 \times 10^{-3}$ | $1.20 \times 10^{-4}$ |
|                          | Pb | $4.00 \times 10^{-2}$ | $4.80 \times 10^{-2}$ | $8.80 \times 10^{-2}$ | $2.70 \times 10^{-1}$ | $2.00 \times 10^{-2}$ |
|                          | Bi | $2.00 \times 10^{-5}$ | $2.20 \times 10^{-3}$ | nd                    | nd                    | $1.20 \times 10^{-4}$ |
|                          | Th | $7.40 \times 10^{-4}$ | $3.00 \times 10^{-4}$ | nd                    | $4.90 \times 10^{-3}$ | $3.80 \times 10^{-3}$ |
|                          | U  | nd                    | $1.80 \times 10^{-3}$ | nd                    | $1.00 \times 10^{-3}$ | $1.00 \times 10^{-3}$ |
